# Supplementary material
Source: bioRxiv or medRxiv preprint supplement (https://www.medrxiv.org/highwire/filestream/92592/field_highwire_adjunct_files/0/2020.08.07.20167130-1.pdf)
Supplement: Supplementary file [file 2020.08.07.20167130-1.pdf]

| No. | DLM<br>8<br>mg/L | DLM<br>4<br>mg/L | DLM<br>2<br>mg/L | DLM<br>1<br>mg/L | DLM<br>0.5<br>mg/L | DLM<br>0.25<br>mg/L | DLM<br>0.125<br>mg/L | DLM<br>0.06<br>mg/L | DLM<br>0.03<br>mg/L | DLM<br>0.015<br>mg/L | GC | SC |
|-----|------------------|------------------|------------------|------------------|--------------------|---------------------|----------------------|---------------------|---------------------|----------------------|----|----|
| 9   |                  |                  |                  |                  |                    |                     |                      |                     |                     |                      |    |    |
| 5   |                  |                  |                  |                  |                    |                     |                      |                     |                     |                      |    |    |
| 0   |                  |                  |                  |                  |                    |                     |                      |                     |                     |                      |    |    |

**Supplementary Figure 1.** *Mycobacterium tuberculosis* (*Mtb*) strains were pre-inoculated in Mycobacteria Growth Indicator Tubes (MGIT, BD, Franklin lakes, New Jersey, USA) and further processed at day 5 to 7 of positivity. The bacterial sediment was withdrawn from the MGIT tube, suspended in 1 ml MGIT broth, vigorously vortexed in the presence of glass beads (3 mm diameter) and further diluted 1:100. Then, a 96-well plate containing 50  $\mu$ l of a ten-point-two-fold dilution series of delamanid, which was derived from dissolved tablets, was inoculated with 100  $\mu$ l of the diluted bacterial suspension. The highest and lowest final delamanid concentration was 8 mg/L and 0.015 mg/L, respectively. Plates were sealed and incubated at 37 °C. Growth was documented by a microplate reader at days 7, 14 and 21. One well per strain without antibiotic served as positive growth control; one well without bacteria served as sterility control. Abbreviations: GC, growth control; SC, sterility control; DLM, delamanid; No., patient number; 0 = Reference strain H37Rv ATCC.
